# Supplementary material for: AMPKα1 is essential for Glucocorticoid Receptor triggered anti-inflammatory macrophage activation
Source: bioRxiv or medRxiv preprint supplement (doi:10.1101/2020.01.02.892836), 2020-06-06
Supplement: Supplementary file [file media-2.pdf]

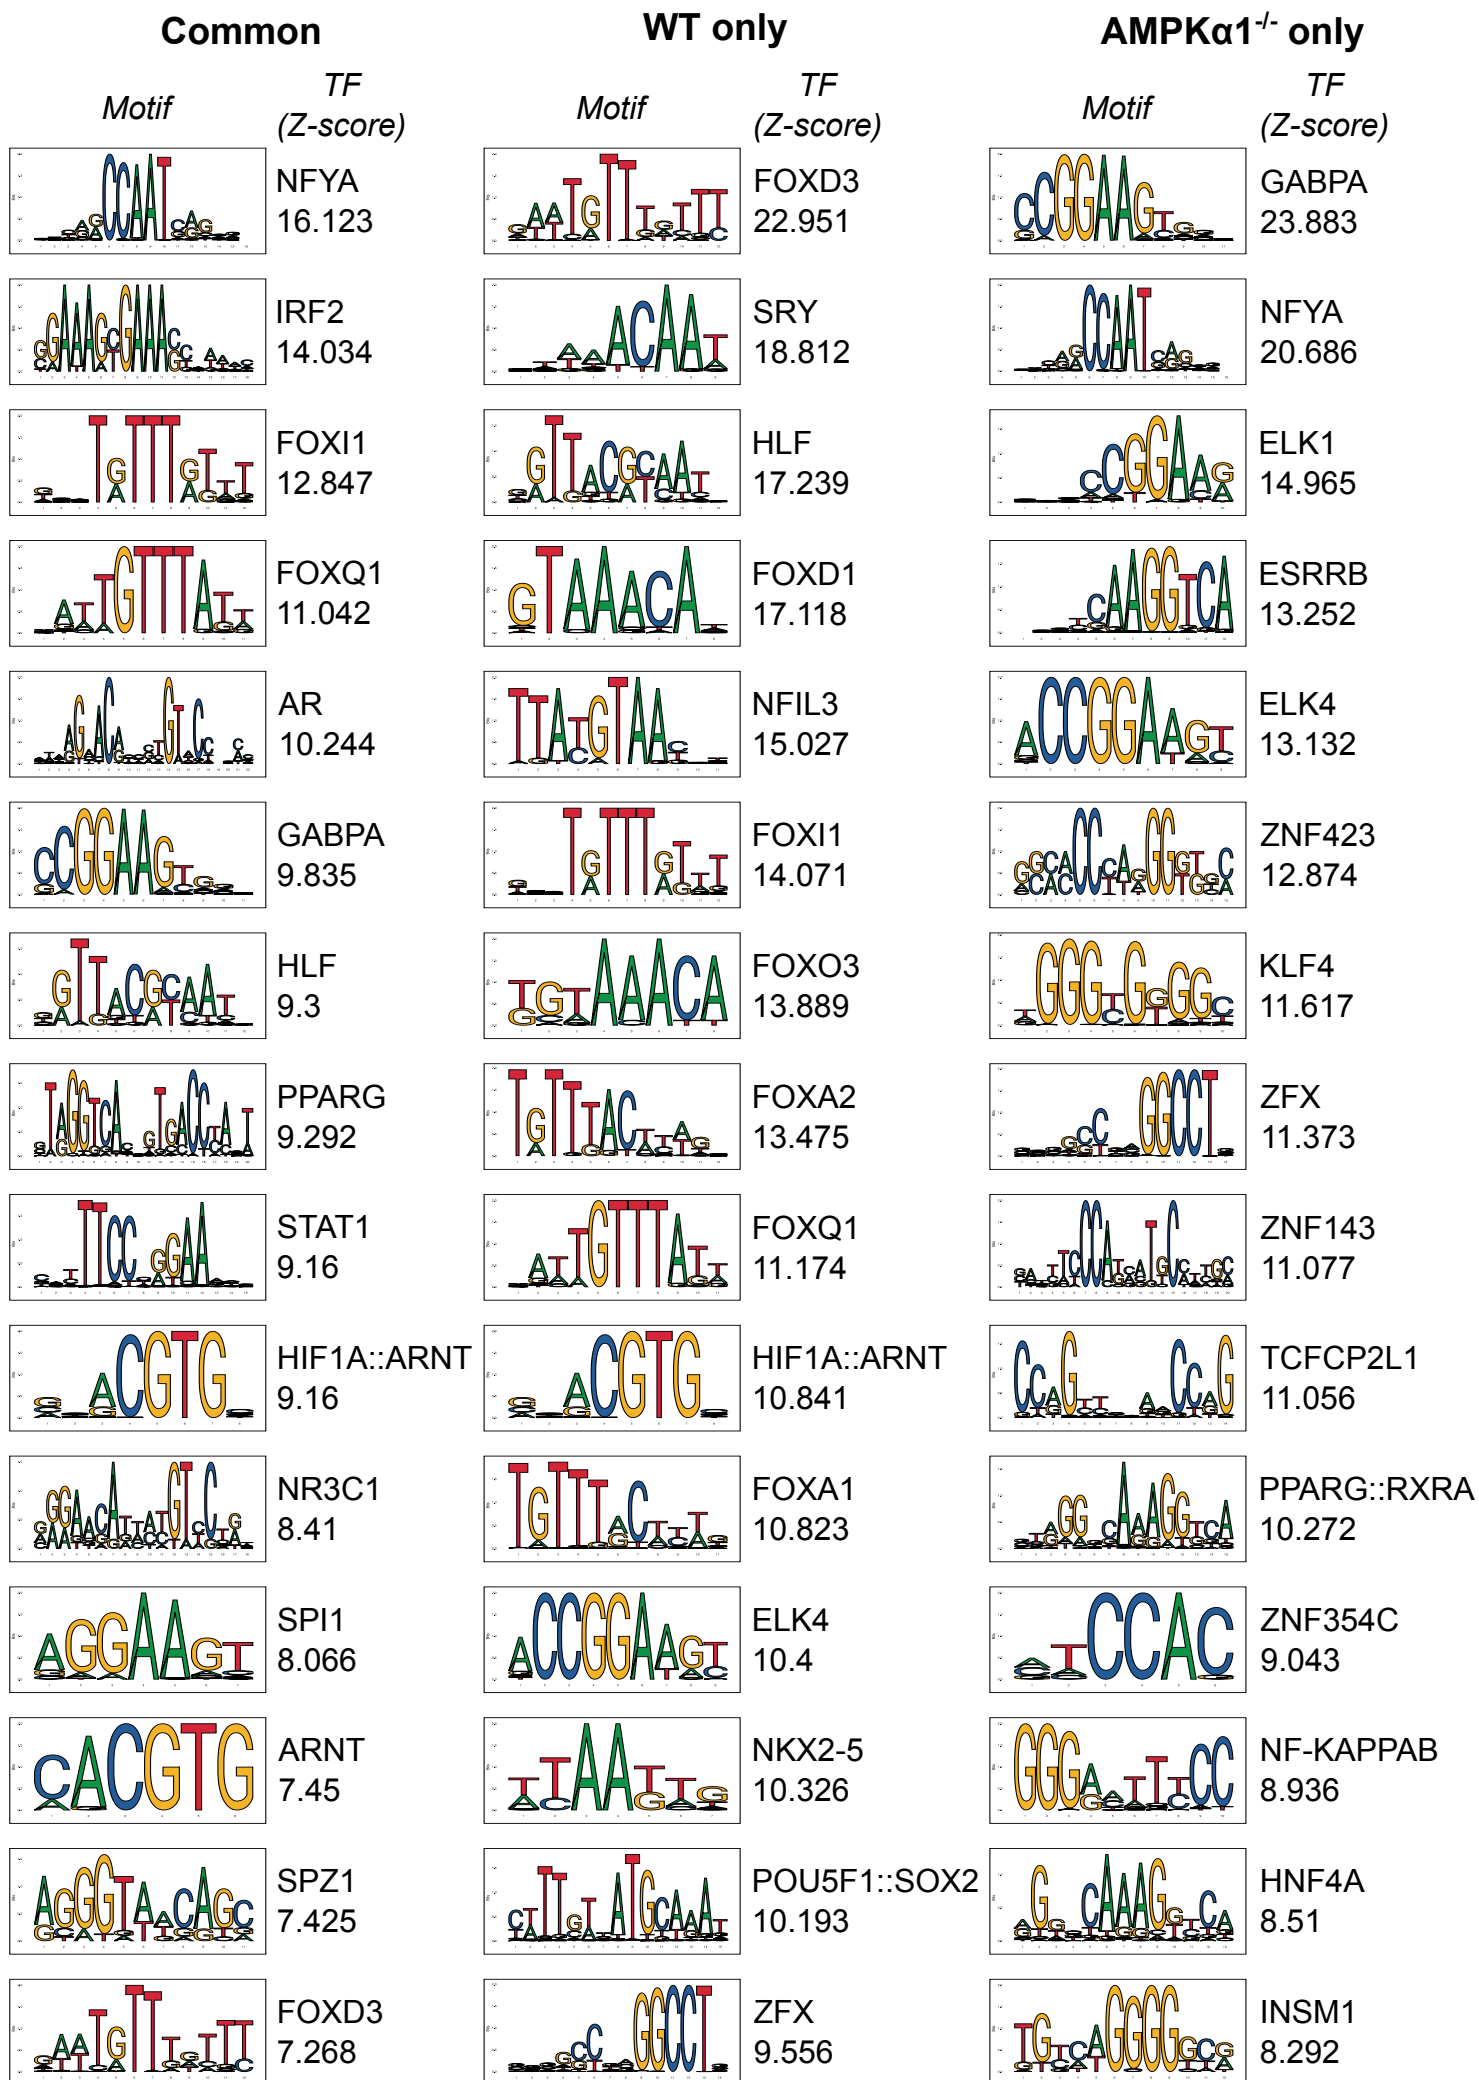

Figure S2
